# Supplementary material
Source: PubMed Central journal article supplement (PMC2858974)
Supplement: NIHMS105929-supplement-3.pdf [file NIHMS105929-supplement-3.pdf]

## Supplementary Tables

**Table S1: Initial conditions and synthesis/degradation rates.** See <sup>1</sup> for reaction equations; \* indicates a unitless constant.

|    | Initial conditions   | HeLa Base case initial condition (molecules/cell) | Synthesis rate (molecules/s) | Degradation rate (1/s) | Coefficient of variation |
|----|----------------------|---------------------------------------------------|------------------------------|------------------------|--------------------------|
| 1  | Ligand               | 1000*                                             | 0                            | 2.9E-6                 | 0                        |
| 2  | Receptor             | 1000                                              | 0.00044                      | 2.9E-6                 | 0.25                     |
| 3  | Ligand:Receptor      | 0                                                 | 0                            | 2.9E-6                 | N/A                      |
| 4  | Receptor*            | 0                                                 | 0                            | 2.9E-6                 | N/A                      |
| 5  | Flip                 | 2000                                              | 0.00087                      | 2.9E-6                 | 0.25                     |
| 6  | Flip:Receptor*       | 0                                                 | 0                            | 2.9E-6                 | N/A                      |
| 7  | Caspase-8            | 10000                                             | 0.00435                      | 2.9E-6                 | 0.25                     |
| 8  | Caspase-8:Receptor*  | 0                                                 | 0                            | 2.9E-6                 | N/A                      |
| 9  | Caspase-8*           | 0                                                 | 0                            | 2.9E-6                 | N/A                      |
| 10 | Bar                  | 1000                                              | 0.00044                      | 2.9E-6                 | 0.25                     |
| 11 | Caspase-8*:Bar       | 0                                                 | 0                            | 2.9E-6                 | N/A                      |
| 12 | Caspase-3            | 10000                                             | 0.00435                      | 2.9E-6                 | 0.282                    |
| 13 | Caspase-8*:Caspase-3 | 0                                                 | 0                            | 2.9E-6                 | N/A                      |
| 14 | Caspase-3*           | 0                                                 | 0                            | 2.9E-6                 | N/A                      |
| 15 | Caspase-6            | 10000                                             | 0.00435                      | 2.9E-6                 | 0.25                     |
| 16 | Caspase-3*:Caspase-6 | 0                                                 | 0                            | 2.9E-6                 | N/A                      |
| 17 | Caspase-6*           | 0                                                 | 0                            | 2.9E-6                 | N/A                      |
| 18 | Caspase-6*:Caspase-8 | 0                                                 | 0                            | 2.9E-6                 | N/A                      |
| 19 | XIAP                 | 100000                                            | 0.04350                      | 2.9E-6                 | 0.288                    |
| 20 | XIAP:Caspase-3*      | 0                                                 | 0                            | 2.9E-6                 | N/A                      |
| 21 | PARP                 | 1000000                                           | 0.43500                      | 2.9E-6                 | 0.25                     |
| 22 | Caspase-3*:PARP      | 0                                                 | 0                            | 2.9E-6                 | N/A                      |
| 23 | cPARP                | 0                                                 | 0                            | 0                      | N/A                      |
| 24 | Bid                  | 60000                                             | 0.02610                      | 2.9E-6                 | 0.288                    |
| 25 | Caspase-8*:Bid       | 0                                                 | 0                            | 2.9E-6                 | N/A                      |
| 26 | tBid                 | 0                                                 | 0                            | 2.9E-6                 | N/A                      |
| 27 | Mcl-1                | 20000                                             | 0.00870                      | 0.0001                 | 0.25                     |
| 28 | tBid:Mcl-1           | 0                                                 | 0                            | 2.9E-6                 | N/A                      |
| 29 | Bax                  | 80000                                             | 0.03480                      | 2.9E-6                 | 0.271                    |
| 30 | tBid:Bax             | 0                                                 | 0                            | 2.9E-6                 | N/A                      |
| 31 | Bax*                 | 0                                                 | 0                            | 2.9E-6                 | N/A                      |
| 32 | Bax*_m               | 0                                                 | 0                            | 2.9E-6                 | N/A                      |
| 33 | Bcl-2                | 30000                                             | 0.00870                      | 2.9E-6                 | 0.294                    |
| 34 | Bax*_m:Bcl-2         | 0                                                 | 0                            | 2.9E-6                 | N/A                      |
| 35 | Bax*2_m              | 0                                                 | 0                            | 2.9E-6                 | N/A                      |
| 36 | Bax*2_m:Bcl-2        | 0                                                 | 0                            | 2.9E-6                 | N/A                      |
| 37 | Bax*4_m              | 0                                                 | 0                            | 2.9E-6                 | N/A                      |
| 38 | Bax*4_m:Bcl-2        | 0                                                 | 0                            | 2.9E-6                 | N/A                      |
| 39 | Pore                 | 500000                                            | 0.21750                      | 2.9E-6                 | 0.25                     |
| 40 | Bax*4:Pore           | 0                                                 | 0                            | 2.9E-6                 | N/A                      |
| 41 | Pore*                | 0                                                 | 0                            | 0.0001                 | N/A                      |
| 42 | CytoC_m              | 500000                                            | 0.21750                      | 2.9E-6                 | 0.25                     |
| 43 | M*:CytoC_m           | 0                                                 | 0                            | 2.9E-6                 | N/A                      |
| 44 | CytoC_r              | 0                                                 | 0                            | 2.9E-6                 | N/A                      |
| 45 | Smac                 | 100000                                            | 0.04350                      | 2.9E-6                 | 0.25                     |
| 46 | M*:Smac              | 0                                                 | 0                            | 2.9E-6                 | N/A                      |
| 47 | Smac_r               | 0                                                 | 0                            | 2.9E-6                 | N/A                      |
| 48 | CytoC                | 0                                                 | 0                            | 2.9E-6                 | N/A                      |
| 49 | Apaf                 | 100000                                            | 0.04350                      | 2.9E-6                 | 0.25                     |
| 50 | Apaf:CytoC           | 0                                                 | 0                            | 2.9E-6                 | N/A                      |
| 51 | Apaf*                | 0                                                 | 0                            | 2.9E-6                 | N/A                      |
| 52 | Caspase-9            | 100000                                            | 0.04350                      | 2.9E-6                 | 0.25                     |
| 53 | Apoptosome           | 0                                                 | 0                            | 2.9E-6                 | N/A                      |
| 54 | Apoptosome:Caspase-3 | 0                                                 | 0                            | 2.9E-6                 | N/A                      |
| 55 | Smac                 | 0                                                 | 0                            | 2.9E-6                 | N/A                      |
| 56 | Apoptosome:XIAP      | 0                                                 | 0                            | 2.9E-6                 | N/A                      |
| 57 | Smac:XIAP            | 0                                                 | 0                            | 2.9E-6                 | N/A                      |
| 58 | Caspase-3*_Ub        | 0                                                 | 0                            | 2.9E-6                 | N/A                      |

**Table S2: Kinetic rate parameters.** See <sup>1</sup> for reaction equations. \* indicates units of 1/s.

| forward rates | 1/(s*molec/cell) | reverse rates | 1/s      | catalytic rates | 1/s   |
|---------------|------------------|---------------|----------|-----------------|-------|
| k1            | 4.00E-07*        | kr1           | 1.00E-06 | kc1             | 1E-02 |
| k2            | 1.00E-06         | kr2           | 0.001    | kc2             | 0     |
| k3            | 1.00E-07         | kr3           | 0.001    | kc3             | 1     |
| k4            | 1.00E-06         | kr4           | 0.001    | kc4             | 0     |
| k5            | 1.00E-07         | kr5           | 0.001    | kc5             | 1     |
| k6            | 1.00E-07         | kr6           | 0.001    | kc6             | 1     |
| k7            | 1.00E-07         | kr7           | 0.001    | kc7             | 1     |
| k8            | 2.00E-06         | kr8           | 0.001    | kc8             | 0.1   |
| k9            | 1.00E-06         | kr9           | 0.001    | kc9             | 20    |
| k10           | 1.00E-07         | kr10          | 0.001    | kc10            | 1     |
| k11           | 1.00E-06         | kr11          | 0.001    | kc11            | 0     |
| k12           | 1.00E-07         | kr12          | 0.001    | kc12            | 1     |
| k13           | 0.01             | kr13          | 1        | kc13            | 0     |
| k14           | 1.00E-06         | kr14          | 0.001    | kc14            | 0     |
| k15           | 1.00E-06         | kr15          | 0.001    | kc15            | 0     |
| k16           | 1.00E-06         | kr16          | 0.001    | kc16            | 0     |
| k17           | 1.00E-06         | kr17          | 0.001    | kc17            | 0     |
| k18           | 1.00E-06         | kr18          | 0.001    | kc18            | 0     |
| k19           | 1.00E-06         | kr19          | 0.001    | kc19            | 1     |
| k20           | 2.00E-06         | kr20          | 0.001    | kc20            | 10    |
| k21           | 2.00E-06         | kr21          | 0.001    | kc21            | 10    |
| k22           | 1                | kr22          | 0.01     | kc22            | 0     |
| k23           | 5.00E-07         | kr23          | 0.001    | kc23            | 1     |
| k24           | 5.00E-08         | kr24          | 0.001    | kc24            | 0     |
| k25           | 5.00E-09         | kr25          | 0.001    | kc25            | 1     |
| k26           | 1                | kr26          | 0.01     | kc26            | 0     |
| k27           | 2.00E-06         | kr27          | 0.001    | kc27            | 0     |
| k28           | 7.00E-06         | kr28          | 0.001    | kc28            | 0     |
| k29           | 5.00E-08         | kr29          | 0.001    | kc29            | 1     |
| k30           | 6.00E-07         | kr30          | 0.001    | kc30            | 0     |
| k31           | 0.01             | kr31          | 0        | kc31            | 0     |

## Supplementary Tables References

<sup>1</sup> J. G. Albeck, J. M. Burke, S. L. Spencer et al., *PLoS Biol* **6** (12), 2831 (2008).
